# Supplementary material
Source: PubMed Central journal article supplement (PMC6503514)
Supplement: jamapediatr-173-455-s001.pdf [file jamapediatr-173-455-s001.pdf]

## Supplementary Online Content

Horbar JD, Edwards EM, Greenberg LT, et al. Racial segregation and inequality in the neonatal intensive care unit for very low-birth-weight and very preterm infants. *JAMA Pediatr*. Published online March 25, 2019. doi:10.1001/jamapediatrics.2019.0241

**eFigure.** Racial Distribution within Quintiles of Baby-MONITOR scores

**eTable 1.** Quintiles of Proportion of White Infants and Average Proportions of Infants Within Quintiles

**eTable 2.** Participating Hospitals

This supplementary material has been provided by the authors to give readers additional information about their work.

**eFigure.** Racial Distribution within Quintiles of Baby-MONITOR scores

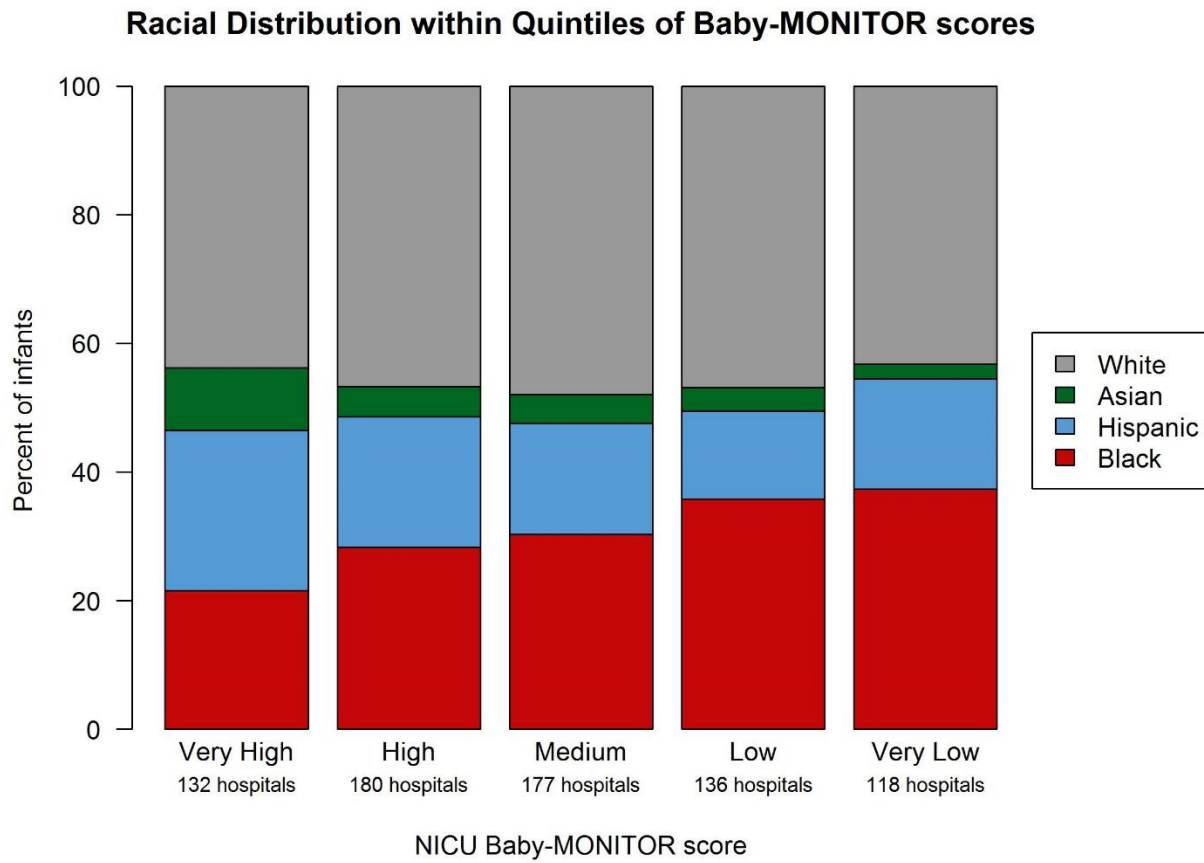

**eTable 1.** Quintiles of Proportion of White Infants and Average Proportions of Infants Within Quintiles

|          | Distribution in Study Population | Ranked by Proportion of White Infants |                       |                          |                       |                            |
|----------|----------------------------------|---------------------------------------|-----------------------|--------------------------|-----------------------|----------------------------|
|          |                                  | Very High (n=112 hospitals)           | High (n=86 hospitals) | Medium (n=112 hospitals) | Low (n=142 hospitals) | Very Low (n=291 hospitals) |
| White    | 46%                              | 83%                                   | 69%                   | 58%                      | 45%                   | 23%                        |
| Black    | 31%                              | 9%                                    | 20%                   | 24%                      | 33%                   | 41%                        |
| Hispanic | 19%                              | 6%                                    | 8%                    | 13%                      | 17%                   | 29%                        |
| Asian    | 5%                               | 2%                                    | 3%                    | 5%                       | 5%                    | 6%                         |
| Total    | 100%                             | 100%                                  | 100%                  | 100%                     | 100%                  | 100%                       |

**eTable 2. Participating Hospitals**

|                                                     |              |            |
|-----------------------------------------------------|--------------|------------|
| Brookwood Medical Center                            | Birmingham   | Alabama    |
| St. Vincent Birmingham                              | Birmingham   | Alabama    |
| University of Alabama at Birmingham                 | Birmingham   | Alabama    |
| Huntsville Hospital                                 | Huntsville   | Alabama    |
| USA Children's and Women's Hospital                 | Mobile       | Alabama    |
| Baptist Medical Center East                         | Montgomery   | Alabama    |
| Baptist Medical Center South                        | Montgomery   | Alabama    |
| Children's Hospital at Providence, Alaska, The      | Anchorage    | Alaska     |
| Flagstaff Medical Center                            | Flagstaff    | Arizona    |
| Abrazo Arrowhead Campus                             | Glendale     | Arizona    |
| Banner Thunderbird Medical Center                   | Glendale     | Arizona    |
| Cardon Children's Medical Center                    | Mesa         | Arizona    |
| Arizona Children's Center Maricopa Integrated Hlth. | Phoenix      | Arizona    |
| Banner Estrella Medical Center                      | Phoenix      | Arizona    |
| Banner University Medical Center Phoenix            | Phoenix      | Arizona    |
| Phoenix Children's Hospital                         | Phoenix      | Arizona    |
| St. Joseph's Hospital and Medical Center            | Phoenix      | Arizona    |
| HonorHealth Scottsdale Shea Medical Center          | Scottsdale   | Arizona    |
| Banner University Medical Center - Tucson           | Tucson       | Arizona    |
| Washington Regional Medical Center                  | Fayetteville | Arkansas   |
| Mercy Hospital Fort Smith                           | Fort Smith   | Arkansas   |
| Willow Creek Women's Hospital - NICU                | Johnson      | Arkansas   |
| St. Bernards Medical Center                         | Jonesboro    | Arkansas   |
| Arkansas Children's Hospital                        | Little Rock  | Arkansas   |
| University of Arkansas for Medical Sciences         | Little Rock  | Arkansas   |
| Mercy Hospital Northwest Arkansas                   | Rogers       | Arkansas   |
| Anaheim Regional Medical Center                     | Anaheim      | California |
| KF - Orange County - Anaheim                        | Anaheim      | California |
| St. Mary Medical Center - Apple Valley              | Apple Valley | California |
| Methodist Hospital of Southern California           | Arcadia      | California |
| Bakersfield Memorial Hospital                       | Bakersfield  | California |
| Kern Medical Center                                 | Bakersfield  | California |
| Mercy Southwest Hospital                            | Bakersfield  | California |
| San Joaquin Community Hospital                      | Bakersfield  | California |
| KF - Baldwin Park                                   | Baldwin Park | California |
| Alta Bates Summit Medical Center                    | Berkeley     | California |
| Providence St. Joseph Medical Center                | Burbank      | California |
| Mercy San Juan Medical Center                       | Carmichael   | California |
| Rady Children's at Scripps Mercy Chula Vista        | Chula Vista  | California |

|                                                    |                 |            |
|----------------------------------------------------|-----------------|------------|
| Scripps Mercy Hospital Chula Vista                 | Chula Vista     | California |
| Sharp Chula Vista Medical Center                   | Chula Vista     | California |
| Clovis Community Medical Center                    | Clovis          | California |
| Arrowhead Regional Medical Center                  | Colton          | California |
| KF - Downey                                        | Downey          | California |
| Rady Children's at Scripps Encinitas Memorial Hosp | Encinitas       | California |
| Rady Children's at Palomar Health Downtown Campus  | Escondido       | California |
| Northbay Medical Center                            | Fairfield       | California |
| KF - Fontana                                       | Fontana         | California |
| Fountain Valley Regional Hospital & Medical Center | Fountain Valley | California |
| Washington Hospital Healthcare System              | Fremont         | California |
| San Joaquin General Hospital (SIGH)                | French Camp     | California |
| Community Regional Med. Ctr. Fresno                | Fresno          | California |
| Valley Children's Hospital at St. Agnes Medical Ce | Fresno          | California |
| St. Jude Medical Center                            | Fullerton       | California |
| Glendale Adventist Medical Center                  | Glendale        | California |
| Glendale Memorial Hospital and Health Center       | Glendale        | California |
| Marin General Hospital                             | Greenbrae       | California |
| KF - South Bay                                     | Harbor City     | California |
| Centinela Hospital Medical Center                  | Inglewood       | California |
| KF - Irvine                                        | Irvine          | California |
| Rady Children's at Scripps La Jolla                | La Jolla        | California |
| Grossmont Hospital, Women's Health Center          | La Mesa         | California |
| Saddleback Memorial Medical Center                 | Laguna Hills    | California |
| Antelope Valley Hospital                           | Lancaster       | California |
| Loma Linda University Children's Hospital          | Loma Linda      | California |
| Miller Children's and Women's Hospital at Long Bea | Long Beach      | California |
| St. Mary Medical Center                            | Long Beach      | California |
| Adventist Health - White Memorial                  | Los Angeles     | California |
| California Hospital Medical Center - Los Angeles   | Los Angeles     | California |
| Cedars-Sinai Medical Center (CSMC)                 | Los Angeles     | California |
| Children's Hospital Los Angeles (CHLA)             | Los Angeles     | California |
| Good Samaritan Hospital, Los Angeles               | Los Angeles     | California |
| Hollywood Presbyterian Medical Center              | Los Angeles     | California |
| KF - Sunset/Los Angeles                            | Los Angeles     | California |
| KF - West Los Angeles                              | Los Angeles     | California |
| LAC/USC                                            | Los Angeles     | California |
| UCLA Mattel Children's Hospital at Ronald Reagan   | Los Angeles     | California |
| St. Francis Medical Center                         | Lynwood         | California |
| Valley Children's Hospital                         | Madera          | California |
| Providence Holy Cross Medical Center               | Mission Hills   | California |

|                                                   |                |            |
|---------------------------------------------------|----------------|------------|
| CHOC Children's at Mission Hospital               | Mission Viejo  | California |
| Doctors Medical Center of Modesto                 | Modesto        | California |
| KP - Modesto                                      | Modesto        | California |
| Memorial Medical Center - Modesto                 | Modesto        | California |
| Garfield Medical Center                           | Monterey Park  | California |
| Riverside University Health System Medical Center | Moreno Valley  | California |
| El Camino Hospital                                | Mountain View  | California |
| Rady Children's at Rancho Springs Medical Center  | Murrieta       | California |
| Hoag Memorial Presbyterian Hospital               | Newport Beach  | California |
| Northridge Hospital Medical Center                | Northridge     | California |
| KP - Oakland                                      | Oakland        | California |
| UCSF Benioff Children's Hospital - Oakland        | Oakland        | California |
| Tri-City Health Care District                     | Oceanside      | California |
| KF - Ontario Campus                               | Ontario        | California |
| CHOC Children's Hospital                          | Orange         | California |
| UC Irvine Medical Center                          | Orange         | California |
| St. John's Regional Medical Center                | Oxnard         | California |
| Desert Regional Medical Center                    | Palm Springs   | California |
| Lucile Packard Children's Hospital Stanford       | Palo Alto      | California |
| KF - Panorama City                                | Panorama City  | California |
| Huntington Memorial Hospital                      | Pasadena       | California |
| Pomona Valley Hospital Medical Center             | Pomona         | California |
| Mercy Medical Center - Redding                    | Redding        | California |
| Redlands Community Hospital                       | Redlands       | California |
| LPCH Special Care Nursery at Sequoia Hospital     | Redwood City   | California |
| KF - Riverside                                    | Riverside      | California |
| Parkview Community Hospital                       | Riverside      | California |
| Riverside Community Hospital                      | Riverside      | California |
| KP - Sacramento/Roseville                         | Roseville      | California |
| Sutter Roseville Medical Center                   | Roseville      | California |
| Anderson Lucchetti Women's and Children's Center  | Sacramento     | California |
| Methodist Hospital of Sacramento                  | Sacramento     | California |
| UC Davis Medical Center                           | Sacramento     | California |
| Natividad Medical Center                          | Salinas        | California |
| Salinas Valley Memorial Healthcare System         | Salinas        | California |
| Community Hospital of San Bernardino              | San Bernardino | California |
| St. Bernadine Medical Center                      | San Bernardino | California |
| KF - San Diego                                    | San Diego      | California |
| Rady Children's at Scripps Mercy San Diego        | San Diego      | California |
| Rady Children's Hospital San Diego (RCHSD)        | San Diego      | California |
| Scripps Mercy Hospital San Diego                  | San Diego      | California |

|                                                   |                 |            |
|---------------------------------------------------|-----------------|------------|
| Sharp Mary Birch Hospital for Women               | San Diego       | California |
| UCSD Medical Center - Hillcrest                   | San Diego       | California |
| California Pacific Medical Center - West (CPMC)   | San Francisco   | California |
| KP - San Francisco                                | San Francisco   | California |
| UCSF Benioff Children's Hospital in San Francisco | San Francisco   | California |
| Zuckerberg San Francisco General Hospital         | San Francisco   | California |
| San Gabriel Valley Medical Center                 | San Gabriel     | California |
| Good Samaritan Hospital, San Jose                 | San Jose        | California |
| O'Connor Hospital - San Jose                      | San Jose        | California |
| Regional Medical Center of San Jose               | San Jose        | California |
| Santa Clara Valley Medical Center (SCVMC)         | San Jose        | California |
| KP - San Leandro (Hayward)                        | San Leandro     | California |
| Sierra Vista Regional Medical Center              | San Luis Obispo | California |
| Orange County Global Medical Center               | Santa Ana       | California |
| Santa Barbara Cottage Hospital                    | Santa Barbara   | California |
| KP - Santa Clara                                  | Santa Clara     | California |
| Dominican Hospital, Santa Cruz                    | Santa Cruz      | California |
| Marian Regional Medical Center                    | Santa Maria     | California |
| Santa Monica - UCLA Medical Center                | Santa Monica    | California |
| St. John's Health Center                          | Santa Monica    | California |
| Santa Rosa Memorial Hospital                      | Santa Rosa      | California |
| Sutter Santa Rosa Regional Hospital               | Santa Rosa      | California |
| Dameron Hospital Association                      | Stockton        | California |
| St. Joseph's Medical Center, Stockton             | Stockton        | California |
| Olive View - UCLA Medical Center                  | Sylmar          | California |
| Providence Tarzana Medical Center                 | Tarzana         | California |
| Los Robles Regional Hospital & Medical Center     | Thousand Oaks   | California |
| Harbor UCLA Medical Center                        | Torrance        | California |
| Providence Little Company of Mary Medical Center  | Torrance        | California |
| Torrance Memorial Medical Center                  | Torrance        | California |
| San Antonio Regional Hospital                     | Upland          | California |
| Henry Mayo Newhall Memorial Hospital              | Valencia        | California |
| Valley Presbyterian Hospital                      | Van Nuys        | California |
| Community Memorial Hospital of Ventura            | Ventura         | California |
| Ventura County Medical Center (VCMC)              | Ventura         | California |
| Kaweah Delta Healthcare District                  | Visalia         | California |
| John Muir Medical Center                          | Walnut Creek    | California |
| KP - Walnut Creek                                 | Walnut Creek    | California |
| Watsonville Community Hospital                    | Watsonville     | California |
| Citrus Valley Medical Center                      | West Covina     | California |
| Presbyterian Intercommunity Hospital (PIH Health) | Whittier        | California |

|                                                    |                   |                      |
|----------------------------------------------------|-------------------|----------------------|
| KF - Woodland Hills                                | Woodland Hills    | California           |
| UCHSC                                              | Aurora            | Colorado             |
| St. Francis Medical Center                         | Colorado Springs  | Colorado             |
| Denver Health Medical Center                       | Denver            | Colorado             |
| Rocky Mountain Hospital for Children at P/SL       | Denver            | Colorado             |
| Rose Medical Center                                | Denver            | Colorado             |
| Saint Joseph Hospital                              | Denver            | Colorado             |
| Swedish Medical Center                             | Englewood         | Colorado             |
| Poudre Valley Health System                        | Fort Collins      | Colorado             |
| St. Mary's Hospital and Medical Center             | Grand Junction    | Colorado             |
| Good Samaritan Medical Center                      | Lafayette         | Colorado             |
| Sky Ridge Medical Center                           | Lone Tree         | Colorado             |
| Medical Center of the Rockies                      | Loveland          | Colorado             |
| Yale-New Haven Children's at Bridgeport Hospital   | Bridgeport        | Connecticut          |
| Danbury Hospital                                   | Danbury           | Connecticut          |
| Connecticut Children's NICU at UCONN Health Center | Farmington        | Connecticut          |
| Greenwich Hospital                                 | Greenwich         | Connecticut          |
| Connecticut Children's Medical Center              | Hartford          | Connecticut          |
| St. Francis Hospital                               | Hartford          | Connecticut          |
| Hospital of Central Connecticut, The               | New Britain       | Connecticut          |
| Yale-New Haven Children's Hospital                 | New Haven         | Connecticut          |
| Norwalk Hospital                                   | Norwalk           | Connecticut          |
| Stamford Hospital                                  | Stamford          | Connecticut          |
| Christiana Care Health Services                    | Newark            | Delaware             |
| MedStar Georgetown University Hospital             | Washington        | District Of Columbia |
| Washington Hospital Center                         | Washington        | District Of Columbia |
| Brandon Regional Hospital                          | Brandon           | Florida              |
| Broward General Medical Center                     | Fort Lauderdale   | Florida              |
| Golisano Children's Hospital of Southwest Florida  | Fort Myers        | Florida              |
| Lawnwood Regional Medical Center & Heart Institute | Fort Pierce       | Florida              |
| North Florida Regional Medical Center, Inc.        | Gainesville       | Florida              |
| UF Shands Hospital Gainesville                     | Gainesville       | Florida              |
| Joe DiMaggio Children's Hospital                   | Hollywood         | Florida              |
| UF Health Jacksonville                             | Jacksonville      | Florida              |
| Wolfson Children's Hospital                        | Jacksonville      | Florida              |
| Northwest Medical Center                           | Margate           | Florida              |
| Baptist Children's Hospital                        | Miami             | Florida              |
| Jackson Memorial Hospital                          | Miami             | Florida              |
| Kendall Regional Medical Center                    | Miami             | Florida              |
| Nicklaus Children's Hospital                       | Miami             | Florida              |
| Jackson North Medical Center                       | North Miami Beach | Florida              |



|                                               |                  |         |
|-----------------------------------------------|------------------|---------|
| Florida Hospital for Children                 | Orlando          | Florida |
| Nemours Children's Hospital                   | Orlando          | Florida |
| Winnie Palmer Hospital for Women and Babies   | Orlando          | Florida |
| Gulf Coast Regional Medical Center            | Panama City      | Florida |
| Sacred Heart Health System                    | Pensacola        | Florida |
| Sheridan Children's, Plantation Hospital      | Plantation       | Florida |
| Johns Hopkins All Children's Hospital         | Saint Petersburg | Florida |
| All Children's at Sarasota Memorial           | Sarasota         | Florida |
| Tallahassee Memorial Hospital                 | Tallahassee      | Florida |
| St. Joseph's Children's Hospital              | Tampa            | Florida |
| Tampa General Hospital                        | Tampa            | Florida |
| Women's Center at Florida Hospital - Tampa    | Tampa            | Florida |
| St. Mary's Hospital                           | West Palm Beach  | Florida |
| Piedmont Athens Regional                      | Athens           | Georgia |
| Emory University Hospital, Midtown            | Atlanta          | Georgia |
| Grady Memorial Hospital                       | Atlanta          | Georgia |
| Northside Hospital                            | Atlanta          | Georgia |
| Piedmont Hospital                             | Atlanta          | Georgia |
| Augusta University Health System              | Augusta          | Georgia |
| Wellstar Cobb Hospital                        | Austell          | Georgia |
| Medical Center at Columbus Regional, The      | Columbus         | Georgia |
| Piedmont Rockdale Hospital                    | Conyers          | Georgia |
| Northside Hospital Forsyth                    | Cumming          | Georgia |
| Hamilton Medical Center                       | Dalton           | Georgia |
| Piedmont Fayette Hospital                     | Fayetteville     | Georgia |
| Northeast Georgia Medical Center              | Gainesville      | Georgia |
| Gwinnett Hospital System                      | Lawrenceville    | Georgia |
| Coliseum Medical Center                       | Macon            | Georgia |
| Wellstar Kennestone Hospital                  | Marietta         | Georgia |
| Southern Regional Medical Center              | Riverdale        | Georgia |
| Floyd Medical Center                          | Rome             | Georgia |
| MHUMC Savannah                                | Savannah         | Georgia |
| St. Joseph's/Candler Health System            | Savannah         | Georgia |
| Eastside Medical Center                       | Snellville       | Georgia |
| Piedmont Henry Hospital                       | Stockbridge      | Georgia |
| Kaiser Permanente Moanalua Medical Center     | Honolulu         | Hawaii  |
| Kapiolani Medical Center for Women & Children | Honolulu         | Hawaii  |
| St. Luke's Regional Medical Center            | Boise            | Idaho   |
| Kootenai Health                               | Coeur d'Alene    | Idaho   |
| Eastern Idaho Regional Medical Center (EIRMC) | Idaho Falls      | Idaho   |
| St Luke's Meridian Medical Center             | Meridian         | Idaho   |

|                                              |                 |          |
|----------------------------------------------|-----------------|----------|
| St. Luke's Magic Valley                      | Twin Falls      | Idaho    |
| Rush Copley Medical Center                   | Aurora          | Illinois |
| Memorial Hospital                            | Belleville      | Illinois |
| Memorial Hospital of Carbondale              | Carbondale      | Illinois |
| Illinois Masonic Medical Center              | Chicago         | Illinois |
| John H. Stroger, Jr. Hospital of Cook County | Chicago         | Illinois |
| Mercy Hospital and Medical Center            | Chicago         | Illinois |
| Mt. Sinai Hospital Medical Center            | Chicago         | Illinois |
| Northwestern Memorial                        | Chicago         | Illinois |
| Rush University Medical Center               | Chicago         | Illinois |
| St. Joseph Hospital Chicago                  | Chicago         | Illinois |
| University of Chicago                        | Chicago         | Illinois |
| University of Illinois at Chicago            | Chicago         | Illinois |
| Advocate Good Samaritan Hospital             | Downers Grove   | Illinois |
| Evanston Hospital                            | Evanston        | Illinois |
| Adventist Hinsdale Hospital                  | Hinsdale        | Illinois |
| St. Alexius Medical Center                   | Hoffman Estates | Illinois |
| Provena Saint Joseph Medical Center          | Joliet          | Illinois |
| RMCH at Loyola University Medical Center     | Maywood         | Illinois |
| Centegra Hospital-McHenry                    | McHenry         | Illinois |
| UnityPoint Trinity-Moline                    | Moline          | Illinois |
| Edward Hospital and Health Services          | Naperville      | Illinois |
| Advocate Children's Hospital-Oak Lawn        | Oak Lawn        | Illinois |
| Advocate Children's Hospital - Park Ridge    | Park Ridge      | Illinois |
| CHOI at OSF St. Francis Medical Center       | Peoria          | Illinois |
| UnityPoint Health-Methodist Hospital         | Peoria          | Illinois |
| Rockford Memorial Hospital                   | Rockford        | Illinois |
| St. John's Hospital                          | Springfield     | Illinois |
| Carle Foundation Hospital                    | Urbana          | Illinois |
| Central DuPage Hospital                      | Winfield        | Illinois |
| IU Health North Hospital                     | Carmel          | Indiana  |
| St. Vincent Carmel Hospital                  | Carmel          | Indiana  |
| Franciscan Health Crown Point                | Crown Point     | Indiana  |
| St. Vincent Evansville                       | Evansville      | Indiana  |
| Dupont Hospital                              | Fort Wayne      | Indiana  |
| Lutheran Hospital of Indiana                 | Fort Wayne      | Indiana  |
| Parkview Women's and Children's Hospital     | Fort Wayne      | Indiana  |
| St. Joseph Hospital                          | Fort Wayne      | Indiana  |
| Methodist Hospitals, Inc.                    | Gary            | Indiana  |
| Community Hospital North Indianapolis        | Indianapolis    | Indiana  |
| Franciscan St. Francis Health                | Indianapolis    | Indiana  |

|                                          |                 |           |
|------------------------------------------|-----------------|-----------|
| Riley Hospital for Children at IU Health | Indianapolis    | Indiana   |
| St. Vincent Women's Hospital             | Indianapolis    | Indiana   |
| Franciscan Health Lafayette              | Lafayette       | Indiana   |
| Saint Joseph Regional Medical Center     | Mishawaka       | Indiana   |
| Ball Memorial Hospital                   | Muncie          | Indiana   |
| Community Hospital                       | Munster         | Indiana   |
| Women's Hospital                         | Newburgh        | Indiana   |
| Memorial Hospital                        | South Bend      | Indiana   |
| Union Hospital                           | Terre Haute     | Indiana   |
| UnityPoint Trinity-Bettendorf NSCU       | Bettendorf      | Iowa      |
| St. Luke's Hospital                      | Cedar Rapids    | Iowa      |
| Genesis Medical Center                   | Davenport       | Iowa      |
| Blank Children's Hospital                | Des Moines      | Iowa      |
| Mercy Medical Center                     | Des Moines      | Iowa      |
| University of Iowa Children's Hospital   | Iowa City       | Iowa      |
| St. Luke's Regional Medical Center       | Sioux City      | Iowa      |
| Covenant Medical Center                  | Waterloo        | Iowa      |
| University of Kansas Hospital Authority  | Kansas City     | Kansas    |
| Overland Park Regional Medical Center    | Overland Park   | Kansas    |
| Shawnee Mission Medical Center           | Shawnee Mission | Kansas    |
| Via Christi Hospitals Wichita            | Wichita         | Kansas    |
| Wesley Medical Center                    | Wichita         | Kansas    |
| King's Daughters Medical Center          | Ashland         | Kentucky  |
| The Medical Center NICU Bowling Green    | Bowling Green   | Kentucky  |
| St. Elizabeth Healthcare                 | Edgewood        | Kentucky  |
| Hardin Memorial Hospital                 | Elizabethtown   | Kentucky  |
| Frankfort Regional Medical Center        | Frankfort       | Kentucky  |
| Methodist Hospital                       | Henderson       | Kentucky  |
| Jennie Stuart Medical Center             | Hopkinsville    | Kentucky  |
| Baptist Health Lexington                 | Lexington       | Kentucky  |
| Kentucky Children's Hospital             | Lexington       | Kentucky  |
| Women's Hospital at St. Joseph East, The | Lexington       | Kentucky  |
| Baptist Health Louisville                | Louisville      | Kentucky  |
| Norton Children's Hospital               | Louisville      | Kentucky  |
| Norton Women's and Children's Hospital   | Louisville      | Kentucky  |
| University of Louisville Hospital        | Louisville      | Kentucky  |
| Baptist Health Madisonville              | Madisonville    | Kentucky  |
| Owensboro Health Regional Hospital       | Owensboro       | Kentucky  |
| Baptist Health Paducah                   | Paducah         | Kentucky  |
| Christus St. Frances Cabrini Hospital    | Alexandria      | Louisiana |
| Rapides Women's and Children's Hospital  | Alexandria      | Louisiana |

|                                                 |               |               |
|-------------------------------------------------|---------------|---------------|
| Baton Rouge General Medical Ctr - Bluebonnet    | Baton Rouge   | Louisiana     |
| Ochsner Medical Center Baton Rouge              | Baton Rouge   | Louisiana     |
| Woman's Hospital                                | Baton Rouge   | Louisiana     |
| Lakeview Regional Medical Center                | Covington     | Louisiana     |
| Ochsner Medical Center WestBank                 | Gretna        | Louisiana     |
| North Oaks Medical Center                       | Hammond       | Louisiana     |
| Terrebonne General Medical Center               | Houma         | Louisiana     |
| Lafayette General Medical Center                | Lafayette     | Louisiana     |
| Women's and Children's Hospital                 | Lafayette     | Louisiana     |
| Christus Lake Area Hospital                     | Lake Charles  | Louisiana     |
| Lake Charles Memorial Hosp for Women            | Lake Charles  | Louisiana     |
| West Jefferson Medical Center                   | Marrero       | Louisiana     |
| East Jefferson General Hospital                 | Metairie      | Louisiana     |
| Tulane Lakeside Hospital for Women and Children | Metairie      | Louisiana     |
| St. Francis Medical Center                      | Monroe        | Louisiana     |
| Children's Hospital of New Orleans              | New Orleans   | Louisiana     |
| Ochsner Baptist Medical Center                  | New Orleans   | Louisiana     |
| Touro Infirmary                                 | New Orleans   | Louisiana     |
| CHRISTUS Highland                               | Shreveport    | Louisiana     |
| LSU Health Sciences Center                      | Shreveport    | Louisiana     |
| Willis Knighton South                           | Shreveport    | Louisiana     |
| Eastern Maine Medical Center                    | Bangor        | Maine         |
| Barbara Bush Children's at Maine Medical        | Portland      | Maine         |
| Anne Arundel Medical Center                     | Annapolis     | Maryland      |
| Franklin Square Hospital Center                 | Baltimore     | Maryland      |
| Greater Baltimore Medical Center                | Baltimore     | Maryland      |
| JHBMC Hopkins Bayview Medical Ctr               | Baltimore     | Maryland      |
| Johns Hopkins Hospital                          | Baltimore     | Maryland      |
| Mercy Medical Center - Baltimore                | Baltimore     | Maryland      |
| Sinai Hospital of Baltimore                     | Baltimore     | Maryland      |
| St. Agnes Hospital                              | Baltimore     | Maryland      |
| Univ of Maryland Medical Center                 | Baltimore     | Maryland      |
| Prince George's Hospital Center                 | Cheverly      | Maryland      |
| Howard County General Hospital                  | Columbia      | Maryland      |
| Frederick Memorial Hospital                     | Frederick     | Maryland      |
| Shady Grove Adventist Hospital                  | Rockville     | Maryland      |
| Holy Cross Hospital                             | Silver Spring | Maryland      |
| Univ of Maryland St. Joseph Medical Ctr.        | Towson        | Maryland      |
| Beth Israel Deaconess Medical Center            | Boston        | Massachusetts |
| Boston Medical Center                           | Boston        | Massachusetts |
| Brigham and Women's Hospital                    | Boston        | Massachusetts |

|                                                 |                |               |
|-------------------------------------------------|----------------|---------------|
| Massachusetts General Hospital for Children     | Boston         | Massachusetts |
| Steward St. Elizabeth's Medical Center          | Boston         | Massachusetts |
| Tufts Medical Center                            | Boston         | Massachusetts |
| South Shore Hospital                            | South Weymouth | Massachusetts |
| Baystate Medical Center                         | Springfield    | Massachusetts |
| UMass Memorial Healthcare                       | Worcester      | Massachusetts |
| St. Joseph Mercy Hospital                       | Ann Arbor      | Michigan      |
| U. of MI, CS Mott Children's, Brandon NICU      | Ann Arbor      | Michigan      |
| Beaumont Hospital - Dearborn                    | Dearborn       | Michigan      |
| Children's Hospital of Michigan                 | Detroit        | Michigan      |
| DMC Sinai-Grace Hospital                        | Detroit        | Michigan      |
| Henry Ford Hospital                             | Detroit        | Michigan      |
| Hutzel Women's Hospital                         | Detroit        | Michigan      |
| St. John Hospital & Medical Center              | Detroit        | Michigan      |
| Hurley Medical Center                           | Flint          | Michigan      |
| DeVos Children's, Spectrum Health               | Grand Rapids   | Michigan      |
| Mercy Health Saint Mary's                       | Grand Rapids   | Michigan      |
| Children's Hospital at Bronson                  | Kalamazoo      | Michigan      |
| Sparrow Hospital                                | Lansing        | Michigan      |
| UPHS-Marquette                                  | Marquette      | Michigan      |
| St. Joseph Mercy Oakland                        | Pontiac        | Michigan      |
| William Beaumont Hospital                       | Royal Oak      | Michigan      |
| Covenant Healthcare                             | Saginaw        | Michigan      |
| Providence Hospital & Medical Center            | Southfield     | Michigan      |
| Munson Medical Center                           | Traverse City  | Michigan      |
| Essentia Health- St. Mary's Children's Hospital | Duluth         | Minnesota     |
| Children's Hospitals and Clinics- Minneapolis   | Minneapolis    | Minnesota     |
| Hennepin County Medical Center                  | Minneapolis    | Minnesota     |
| University of MN Masonic Children's Hospital    | Minneapolis    | Minnesota     |
| North Memorial Medical Center                   | Robbinsdale    | Minnesota     |
| Mayo Foundation                                 | Rochester      | Minnesota     |
| St. Cloud Hospital                              | Saint Cloud    | Minnesota     |
| Children's Hospitals and Clinics- St Paul       | Saint Paul     | Minnesota     |
| Merit Health River Oaks                         | Flowood        | Mississippi   |
| Merit Health Woman's Hospital                   | Flowood        | Mississippi   |
| Delta Regional Medical Center                   | Greenville     | Mississippi   |
| Memorial Hospital at Gulfport                   | Gulfport       | Mississippi   |
| Forrest General Hospital                        | Hattiesburg    | Mississippi   |
| Merit Health Wesley                             | Hattiesburg    | Mississippi   |
| Children's Hospital at U. of MS Health Care     | Jackson        | Mississippi   |
| Merit Health Central                            | Jackson        | Mississippi   |

|                                                 |                |               |
|-------------------------------------------------|----------------|---------------|
| Mississippi Baptist Health Systems              | Jackson        | Mississippi   |
| St. Dominic, Jackson Memorial Hospital          | Jackson        | Mississippi   |
| Anderson Regional Medical Center                | Meridian       | Mississippi   |
| North Mississippi Medical Center                | Tupelo         | Mississippi   |
| St. Francis Medical Center                      | Cape Girardeau | Missouri      |
| Women's & Children's Hosp, U. of MO             | Columbia       | Missouri      |
| Centerpoint Medical Center                      | Independence   | Missouri      |
| Freeman Hospital and Health System              | Joplin         | Missouri      |
| Children's Mercy Kansas City                    | Kansas City    | Missouri      |
| Research Medical Center                         | Kansas City    | Missouri      |
| St. Luke's Hospital                             | Kansas City    | Missouri      |
| Truman Medical Center                           | Kansas City    | Missouri      |
| Mercy Children's Hospital, St. Louis            | Saint Louis    | Missouri      |
| SSM Health Cardinal Glennon Children's Hospital | Saint Louis    | Missouri      |
| St. Louis Children's Hospital                   | Saint Louis    | Missouri      |
| Cox Health Neonatology                          | Springfield    | Missouri      |
| Mercy Kids Springfield                          | Springfield    | Missouri      |
| Billings Clinic                                 | Billings       | Montana       |
| St. Vincent Hospital & Health Center            | Billings       | Montana       |
| Benefis Healthcare                              | Great Falls    | Montana       |
| Kalispell Regional Medical Center               | Kalispell      | Montana       |
| Community Medical Center                        | Missoula       | Montana       |
| Good Samaritan Hospital Kearney                 | Kearney        | Nebraska      |
| Bryan Medical Center                            | Lincoln        | Nebraska      |
| St. Elizabeth Regional Medical Center           | Lincoln        | Nebraska      |
| CHI Health Bergan Mercy Medical Center          | Omaha          | Nebraska      |
| Creighton University Medical Center             | Omaha          | Nebraska      |
| Methodist Women's Hospital                      | Omaha          | Nebraska      |
| Nebraska Medical Center                         | Omaha          | Nebraska      |
| St. Rose Dominican Hospital Siena Campus        | Henderson      | Nevada        |
| Children's Hospital of Nevada at UMC            | Las Vegas      | Nevada        |
| Sunrise Hospital and Medical Center             | Las Vegas      | Nevada        |
| Dartmouth Hitchcock Medical Center              | Lebanon        | New Hampshire |
| Elliot Hospital                                 | Manchester     | New Hampshire |
| Children's at Cooper University Medical Center  | Camden         | New Jersey    |
| Our Lady of Lourdes Medical Center              | Camden         | New Jersey    |
| Hackensack University Medical Center            | Hackensack     | New Jersey    |
| Jersey City Medical Center                      | Jersey City    | New Jersey    |
| Saint Barnabas Medical Center                   | Livingston     | New Jersey    |
| Monmouth Medical Center                         | Long Branch    | New Jersey    |
| Mountainside Hospital                           | Montclair      | New Jersey    |

|                                                    |               |            |
|----------------------------------------------------|---------------|------------|
| Goryeb Children's Hospital                         | Morristown    | New Jersey |
| Jersey Shore University Medical Center             | Neptune       | New Jersey |
| Robert Wood Johnson University Hospital            | New Brunswick | New Jersey |
| St. Peter's Medical Center                         | New Brunswick | New Jersey |
| Children's Hospital of New Jersey at NBIMC         | Newark        | New Jersey |
| University Hospital Rutgers-NJMS                   | Newark        | New Jersey |
| St. Joseph Hospital and Medical Center             | Paterson      | New Jersey |
| Capital Health Medical Center-Hopewell             | Pennington    | New Jersey |
| Atlanticare Regional Medical Center - NICU         | Pomona        | New Jersey |
| Shore Medical Center                               | Somers Point  | New Jersey |
| Overlook Medical Center                            | Summit        | New Jersey |
| Community Medical Center Toms River                | Toms River    | New Jersey |
| Inspira Health Network                             | Vineland      | New Jersey |
| Virtua Hospital Systems                            | Voorhees      | New Jersey |
| Hackensack UMC @ Pascack Valley                    | Westwood      | New Jersey |
| Children's Medical Center at Presbyterian Hospital | Albuquerque   | New Mexico |
| Lovelace Women's Hospital                          | Albuquerque   | New Mexico |
| UNM School of Medicine Dept. of Pediatrics         | Albuquerque   | New Mexico |
| Albany Medical Center                              | Albany        | New York   |
| St. Peter's Hospital                               | Albany        | New York   |
| Jacobi Medical Center                              | Bronx         | New York   |
| Montefiore Medical Center-Wakefield Division       | Bronx         | New York   |
| Weiler Hospital Montefiore                         | Bronx         | New York   |
| Brookdale Hospital Medical Center                  | Brooklyn      | New York   |
| Brooklyn Hospital Center, The                      | Brooklyn      | New York   |
| Kings County Hospital Center                       | Brooklyn      | New York   |
| Lutheran Medical Center                            | Brooklyn      | New York   |
| Maimonides Medical Center                          | Brooklyn      | New York   |
| University Hospital of Brooklyn                    | Brooklyn      | New York   |
| Sisters of Charity Hospital                        | Buffalo       | New York   |
| Arnot Ogden Medical Center                         | Elmira        | New York   |
| Queens Hospital Center                             | Jamaica       | New York   |
| North Shore University Hospital                    | Manhasset     | New York   |
| Orange Regional Medical Center                     | Middletown    | New York   |
| Winthrop University Hospital                       | Mineola       | New York   |
| Cohen Children's Medical Center of New York        | New Hyde Park | New York   |
| Bellevue Hospital                                  | New York      | New York   |
| Columbia University Medical Center                 | New York      | New York   |
| Lenox Hill Hospital                                | New York      | New York   |
| Mt. Sinai Kravis Children's Hospital, The          | New York      | New York   |
| Tisch Hospital, NYU Medical Center                 | New York      | New York   |

|                                                    |               |                |
|----------------------------------------------------|---------------|----------------|
| Weill Cornell Medical Center                       | New York      | New York       |
| Vassar Brothers Hospital                           | Poughkeepsie  | New York       |
| Golisano Children's Hospital at Strong             | Rochester     | New York       |
| Richmond University Medical Center                 | Staten Island | New York       |
| Staten Island University Hospital                  | Staten Island | New York       |
| Stony Brook University Medical Center              | Stony Brook   | New York       |
| St. Joseph's Health Center                         | Syracuse      | New York       |
| Good Samaritan Hospital Medical Center             | West Islip    | New York       |
| Mission Children's Hospital                        | Asheville     | North Carolina |
| North Carolina Children's Hospital                 | Chapel Hill   | North Carolina |
| Carolinas Medical Center                           | Charlotte     | North Carolina |
| Novant Health Presbyterian Medical Center          | Charlotte     | North Carolina |
| Jeff Gordon Children's Hospital at CMC             | Concord       | North Carolina |
| Duke University                                    | Durham        | North Carolina |
| Cape Fear Valley Medical Center                    | Fayetteville  | North Carolina |
| Gaston Memorial Hospital                           | Gastonia      | North Carolina |
| Cone Health Women's Hospital                       | Greensboro    | North Carolina |
| Vidant Medical Center                              | Greenville    | North Carolina |
| Catawba Valley Medical Center                      | Hickory       | North Carolina |
| Onslow Memorial Hospital                           | Jacksonville  | North Carolina |
| FirstHealth Moore Regional Hospital                | Pinehurst     | North Carolina |
| Rex Hospital                                       | Raleigh       | North Carolina |
| WakeMedical Center                                 | Raleigh       | North Carolina |
| NHRMC-Betty H. Cameron Women & Children's Hospital | Wilmington    | North Carolina |
| Brenner Children's Hospital at WFUBMC              | Winston-Salem | North Carolina |
| Forsyth Memorial Hospital                          | Winston-Salem | North Carolina |
| Sanford Bismarck Medical Center                    | Bismarck      | North Dakota   |
| Essentia Health                                    | Fargo         | North Dakota   |
| Sanford Medical Center Fargo                       | Fargo         | North Dakota   |
| Altru Health System                                | Grand Forks   | North Dakota   |
| Trinity Hospital                                   | Minot         | North Dakota   |
| Akron Children's Hospital                          | Akron         | Ohio           |
| Akron Children's Special Care Nursery at Summa     | Akron         | Ohio           |
| Akron Children's NICU at St. Elizabeth - Boardman  | Boardman      | Ohio           |
| Aultman Hospital                                   | Canton        | Ohio           |
| Children's Hospital Medical Center Cincinnati      | Cincinnati    | Ohio           |
| Good Samaritan Hospital                            | Cincinnati    | Ohio           |
| University Hospital, Cincinnati                    | Cincinnati    | Ohio           |
| Cleveland Clinic Foundation, The                   | Cleveland     | Ohio           |
| Fairview Hospital                                  | Cleveland     | Ohio           |
| MetroHealth Medical Center                         | Cleveland     | Ohio           |



|                                                 |                  |              |
|-------------------------------------------------|------------------|--------------|
| Rainbow Babies & Children's Hospital            | Cleveland        | Ohio         |
| Mount Carmel East                               | Columbus         | Ohio         |
| Mt. Carmel Health Systems                       | Columbus         | Ohio         |
| NCH at Doctor's Hospital West                   | Columbus         | Ohio         |
| NCH at Grant Medical Center                     | Columbus         | Ohio         |
| NCH at Riverside Methodist Hospital             | Columbus         | Ohio         |
| NCH Main Campus                                 | Columbus         | Ohio         |
| NCH NICU @Ohio State Medical Ctr                | Columbus         | Ohio         |
| Dayton Children's Hospital                      | Dayton           | Ohio         |
| Miami Valley Hospital                           | Dayton           | Ohio         |
| NCH at Dublin Methodist Hospital                | Dublin           | Ohio         |
| Kettering Medical Center                        | Kettering        | Ohio         |
| CCF Children's - Hillcrest NICU                 | Mayfield Heights | Ohio         |
| Mercy Children's Hospital                       | Toledo           | Ohio         |
| Toledo Children's Hospital                      | Toledo           | Ohio         |
| NCH NICU at Mount Carmel St. Ann's Hospital     | Westerville      | Ohio         |
| O.U. Health Sciences Center                     | Oklahoma City    | Oklahoma     |
| Henry Zarrow Neonatal Intensive Care Unit       | Tulsa            | Oklahoma     |
| Oklahoma State University Medical Center, Trust | Tulsa            | Oklahoma     |
| Peggy V. Helmerich Women's Center               | Tulsa            | Oklahoma     |
| St. John Medical Center                         | Tulsa            | Oklahoma     |
| St. Charles Health Care                         | Bend             | Oregon       |
| Kaiser Sunnyside Medical Center                 | Clackamas        | Oregon       |
| Rogue Regional Medical Center                   | Medford          | Oregon       |
| Oregon Health and Science University            | Portland         | Oregon       |
| Providence Portland Medical Center              | Portland         | Oregon       |
| Providence St. Vincent Medical Center           | Portland         | Oregon       |
| Randall Children's Hospital at Legacy Emanuel   | Portland         | Oregon       |
| Salem Hospital                                  | Salem            | Oregon       |
| Sacred Heart Medical Center                     | Springfield      | Oregon       |
| Abington Memorial Hospital                      | Abington         | Pennsylvania |
| Lehigh Valley Health Network                    | Allentown        | Pennsylvania |
| St. Luke's Allentown Campus                     | Allentown        | Pennsylvania |
| St. Luke's University Hospital                  | Bethlehem        | Pennsylvania |
| Bryn Mawr Hospital                              | Bryn Mawr        | Pennsylvania |
| Geisinger Medical Center                        | Danville         | Pennsylvania |
| Penn Highlands DuBois                           | DuBois           | Pennsylvania |
| Einstein Medical Center Montgomery              | East Norriton    | Pennsylvania |
| Ephrata Community Hospital                      | Ephrata          | Pennsylvania |
| Hamot Medical Center                            | Erie             | Pennsylvania |
| St. Vincent Health Center                       | Erie             | Pennsylvania |

|                                                    |              |                |
|----------------------------------------------------|--------------|----------------|
| Pinnacle Health Hospitals                          | Harrisburg   | Pennsylvania   |
| Penn State Children's Hospital                     | Hershey      | Pennsylvania   |
| Conemaugh Memorial Medical Center                  | Johnstown    | Pennsylvania   |
| Lancaster General Health-Women & Babies Hospital   | Lancaster    | Pennsylvania   |
| St. Mary Medical Center                            | Langhorne    | Pennsylvania   |
| Holy Redeemer Hospital and Medical Center          | Meadowbrook  | Pennsylvania   |
| Riddle Hospital                                    | Media        | Pennsylvania   |
| Children's Hospital of Philadelphia Newborn Center | Philadelphia | Pennsylvania   |
| Einstein Medical Center Philadelphia               | Philadelphia | Pennsylvania   |
| Hahnemann University Hospital                      | Philadelphia | Pennsylvania   |
| Hospital of University of Pennsylvania             | Philadelphia | Pennsylvania   |
| Pennsylvania Hospital                              | Philadelphia | Pennsylvania   |
| Temple University Hospital                         | Philadelphia | Pennsylvania   |
| Thomas Jefferson University Hospital               | Philadelphia | Pennsylvania   |
| Magee Women's Hospital                             | Pittsburgh   | Pennsylvania   |
| Western Pennsylvania Hospital                      | Pittsburgh   | Pennsylvania   |
| Reading Hospital-Tower Health                      | Reading      | Pennsylvania   |
| Moses Taylor Hospital                              | Scranton     | Pennsylvania   |
| Crozer Chester Medical Center                      | Upland       | Pennsylvania   |
| CHOP Newborn Care at Chester County Hospital       | West Chester | Pennsylvania   |
| Geisinger Wyoming Valley Medical Center            | Wilkes Barre | Pennsylvania   |
| Lankenau Medical Center                            | Wynnewood    | Pennsylvania   |
| WellSpan York Hospital                             | York         | Pennsylvania   |
| Women & Infants Hospital                           | Providence   | Rhode Island   |
| Medical University of South Carolina               | Charleston   | South Carolina |
| Trident Medical Center                             | Charleston   | South Carolina |
| Palmetto Health Baptist, Women's & Neonatal Svcs   | Columbia     | South Carolina |
| Palmetto Health Richland                           | Columbia     | South Carolina |
| McLeod Regional Medical Center                     | Florence     | South Carolina |
| Children's Hospital of Greenville                  | Greenville   | South Carolina |
| Piedmont Medical Center                            | Rock Hill    | South Carolina |
| Spartanburg Regional Healthcare System             | Spartanburg  | South Carolina |
| Summerville Medical Center                         | Summerville  | South Carolina |
| Rapid City Regional Hospital                       | Rapid City   | South Dakota   |
| Avera McKennan                                     | Sioux Falls  | South Dakota   |
| Boekelheide NICU at Sanford Health                 | Sioux Falls  | South Dakota   |
| Children's Hospital at Erlanger                    | Chattanooga  | Tennessee      |
| Parkridge East Hospital                            | Chattanooga  | Tennessee      |
| Maury Regional Medical Center                      | Columbia     | Tennessee      |
| Jackson Madison County General Hospital            | Jackson      | Tennessee      |
| Niswonger Children's Hospital                      | Johnson City | Tennessee      |

|                                                   |                |           |
|---------------------------------------------------|----------------|-----------|
| East Tennessee Children's Hospital                | Knoxville      | Tennessee |
| University of Tennessee Medical Center            | Knoxville      | Tennessee |
| Baptist Memorial Hospital for Women               | Memphis        | Tennessee |
| Regional One Health                               | Memphis        | Tennessee |
| Children's Hospital at TriStar Centennial, The    | Nashville      | Tennessee |
| Monroe Carell Jr. Children's Hospital Vanderbilt  | Nashville      | Tennessee |
| Baptist St. Anthony's Health System               | Amarillo       | Texas     |
| Texas Tech University Health Science Center       | Amarillo       | Texas     |
| Medical Center of Arlington                       | Arlington      | Texas     |
| Texas Health Arlington Memorial                   | Arlington      | Texas     |
| Dell Children's Medical Center of Central Texas   | Austin         | Texas     |
| North Austin Medical Center                       | Austin         | Texas     |
| Seton Medical Center                              | Austin         | Texas     |
| St. David's Medical Center                        | Austin         | Texas     |
| St. David's South Austin Medical Center           | Austin         | Texas     |
| CHRISTUS Southeast Texas Hospital                 | Beaumont       | Texas     |
| Valley Regional Medical Center TX                 | Brownsville    | Texas     |
| Christus Spohn Hospital Corpus Christi South      | Corpus Christi | Texas     |
| Corpus Christi Medical Center                     | Corpus Christi | Texas     |
| Driscoll Children's Hospital                      | Corpus Christi | Texas     |
| Baylor Healthcare System                          | Dallas         | Texas     |
| Medical City Dallas                               | Dallas         | Texas     |
| Methodist Dallas Medical Center                   | Dallas         | Texas     |
| Presbyterian Hospital of Dallas                   | Dallas         | Texas     |
| Texas Health Presbyterian Hospital Dallas         | Dallas         | Texas     |
| University of Texas Southwestern Med. Ctr. Dallas | Dallas         | Texas     |
| William P. Clements Jr. University Hospital       | Dallas         | Texas     |
| Women's Hospital At Renaissance                   | Edinburg       | Texas     |
| Del Sol Medical Center                            | El Paso        | Texas     |
| El Paso Children's Hospital                       | El Paso        | Texas     |
| Las Palmas Medical Center                         | El Paso        | Texas     |
| Baylor All Saints Medical Center                  | Fort Worth     | Texas     |
| Cook Children's Medical Center                    | Fort Worth     | Texas     |
| Harris Methodist Fort Worth Hospital              | Fort Worth     | Texas     |
| John Peter Smith Hospital                         | Fort Worth     | Texas     |
| University of Texas Medical Branch                | Galveston      | Texas     |
| Ben Taub General Hospital                         | Houston        | Texas     |
| Children's Memorial Hermann Hospital              | Houston        | Texas     |
| Cypress Fairbanks Medical Center Hospital         | Houston        | Texas     |
| Houston Methodist West Hospital                   | Houston        | Texas     |
| Lyndon B. Johnson General Hospital                | Houston        | Texas     |

|                                                   |                 |          |
|---------------------------------------------------|-----------------|----------|
| Memorial Hermann Memorial City Medical Center     | Houston         | Texas    |
| Memorial Hermann Southeast                        | Houston         | Texas    |
| Memorial Hermann Southwest                        | Houston         | Texas    |
| Methodist Willowbrook Hospital                    | Houston         | Texas    |
| St. Joseph Hospital                               | Houston         | Texas    |
| Texas Children's Hospital, Baylor College of Med. | Houston         | Texas    |
| Woman's Hospital of Texas, The                    | Houston         | Texas    |
| Kingwood Medical Center                           | Kingwood        | Texas    |
| Medical City Lewisville                           | Lewisville      | Texas    |
| Christus Good Shepherd Medical Center             | Longview        | Texas    |
| Covenant Women and Children's Hospital            | Lubbock         | Texas    |
| Columbia Medical Center of McKinney               | McKinney        | Texas    |
| Bayshore Medical Center                           | Pasadena        | Texas    |
| Medical City Plano                                | Plano           | Texas    |
| Texas Health Presbyterian Hospital Plano          | Plano           | Texas    |
| Lake Pointe Medical Center                        | Rowlett         | Texas    |
| Children's Hospital of San Antonio                | San Antonio     | Texas    |
| Methodist Children's Hospital                     | San Antonio     | Texas    |
| Metropolitan Methodist Hospital                   | San Antonio     | Texas    |
| North Central Baptist Hospital                    | San Antonio     | Texas    |
| St. Luke's Baptist Hospital                       | San Antonio     | Texas    |
| University Hospital San Antonio                   | San Antonio     | Texas    |
| McLane Children's Hospital                        | Temple          | Texas    |
| Christus St. Michael Health System                | Texarkana       | Texas    |
| Memorial Hermann The Woodlands                    | The Woodlands   | Texas    |
| St. Luke's The Woodlands Hospital                 | The Woodlands   | Texas    |
| Christus Trinity Mother Frances Health System     | Tyler           | Texas    |
| Clear Lake Regional Medical Center                | Webster         | Texas    |
| McKay Dee Hospital Center                         | Ogden           | Utah     |
| Timpanogos Regional Hospital                      | Orem            | Utah     |
| Utah Valley Regional Medical Center               | Provo           | Utah     |
| Dixie Regional Medical Center                     | Saint George    | Utah     |
| Intermountain Medical Center                      | Salt Lake City  | Utah     |
| St. Mark's Hospital                               | Salt Lake City  | Utah     |
| University of Utah Health Sciences Center         | Salt Lake City  | Utah     |
| University of Vermont Children's Hospital         | Burlington      | Vermont  |
| Inova Alexandria Hospital (NICU)                  | Alexandria      | Virginia |
| Virginia Hospital Center                          | Arlington       | Virginia |
| University of Virginia                            | Charlottesville | Virginia |
| Inova Fair Oaks Hospital                          | Fairfax         | Virginia |
| INOVA Children's Hospital                         | Falls Church    | Virginia |

|                                                 |                |               |
|-------------------------------------------------|----------------|---------------|
| Mary Washington Hospital                        | Fredericksburg | Virginia      |
| Spotsylvania Regional Medical Center            | Fredericksburg | Virginia      |
| Inova Loudoun Hospital                          | Leesburg       | Virginia      |
| Centra Health, Virginia Baptist Hospital        | Lynchburg      | Virginia      |
| Children's Hospital of the King's Daughters     | Norfolk        | Virginia      |
| Bon Secours Richmond Health System              | Richmond       | Virginia      |
| Children's Hosp of Richmond at VCU              | Richmond       | Virginia      |
| CJW Medical Center, Chippenham Campus           | Richmond       | Virginia      |
| Henrico Doctors' Hospital                       | Richmond       | Virginia      |
| Johnston-Willis Hospital                        | Richmond       | Virginia      |
| Carilion Clinic Children's Hospital             | Roanoke        | Virginia      |
| Winchester Medical Center                       | Winchester     | Virginia      |
| Sentara Northern Virginia Medical Center        | Woodbridge     | Virginia      |
| Overlake Hospital Medical Center                | Bellevue       | Washington    |
| Providence Regional Medical Center Everett      | Everett        | Washington    |
| Evergreen Health                                | Kirkland       | Washington    |
| UW Medicine - Valley Medical Center             | Renton         | Washington    |
| Kadlec Medical Center                           | Richland       | Washington    |
| Swedish Medical Center                          | Seattle        | Washington    |
| University of Washington Medical Center         | Seattle        | Washington    |
| Deaconess Hospital                              | Spokane        | Washington    |
| Providence Sacred Heart Medical Center          | Spokane        | Washington    |
| MultiCare Health System-Tacoma General Hospital | Tacoma         | Washington    |
| St. Joseph Medical Center                       | Tacoma         | Washington    |
| Legacy Salmon Creek Hospital                    | Vancouver      | Washington    |
| PeaceHealth Southwest Medical Center            | Vancouver      | Washington    |
| Yakima Valley Memorial Hospital                 | Yakima         | Washington    |
| Charleston Area Medical Center                  | Charleston     | West Virginia |
| Cabell Huntington Hospital, Inc.                | Huntington     | West Virginia |
| Berkeley Medical Center                         | Martinsburg    | West Virginia |
| West Virginia University School of Medicine     | Morgantown     | West Virginia |
| Affinity NICU at St. Elizabeth Hospital         | Appleton       | Wisconsin     |
| Aurora Baycare Medical Center                   | Green Bay      | Wisconsin     |
| St. Vincent Hospital                            | Green Bay      | Wisconsin     |
| Gundersen Lutheran Medical Center               | La Crosse      | Wisconsin     |
| American Family Children's Hospital             | Madison        | Wisconsin     |
| Meriter Hospital                                | Madison        | Wisconsin     |
| SSM Health St. Mary's Hospital Medical Center   | Madison        | Wisconsin     |
| St. Joseph Hospital-Marshfield Clinic           | Marshfield     | Wisconsin     |
| Ascension - St. Joseph's Hospital               | Milwaukee      | Wisconsin     |
| Aurora Sinai Medical Center                     | Milwaukee      | Wisconsin     |

|                                              |            |           |
|----------------------------------------------|------------|-----------|
| Children's Hospital of Wisconsin             | Milwaukee  | Wisconsin |
| Columbia St. Mary's Hospital                 | Milwaukee  | Wisconsin |
| Children's Hospital of Wisconsin, Fox Valley | Neenah     | Wisconsin |
| Ascension All Saints Hospital                | Racine     | Wisconsin |
| Waukesha Memorial Hospital                   | Waukesha   | Wisconsin |
| Aspirus Wausau Hospital                      | Wausau     | Wisconsin |
| Aurora Women's Pavilion                      | West Allis | Wisconsin |
